# Supplementary material for: Structural insights into the molecular mechanism of high-level ceftazidime–avibactam resistance conferred by CMY-185
Source: PubMed Central journal article supplement (PMC10865806; doi:10.1128/mbio.02874-23), 2024-01-05
Supplement: mbio.02874-23-s0001.pdf [file mbio.02874-23-s0001.pdf]

## Supplemental Material

### **Structural insights into the molecular mechanism of high-level ceftazidime–avibactam resistance conferred by CMY-185**

Akito Kawai,<sup>1,2</sup> William C. Shropshire,<sup>3</sup> Masahiro Suzuki,<sup>1,2</sup> Jovan Borjan,<sup>4</sup> Samuel L. Aitken,<sup>4</sup> William C. Bachman,<sup>5</sup> Christi L. McElheny,<sup>5</sup> Micah M. Bhatti,<sup>6</sup> Ryan K. Shields,<sup>5</sup> Samuel A. Shelburne,<sup>3</sup> Yohei Doi<sup>1,2,5,7</sup>

<sup>1</sup>Department of Microbiology, Fujita Health University School of Medicine, Toyoake, Aichi, Japan

<sup>2</sup>Center for Infectious Disease Research, Fujita Health University, Toyoake, Aichi, Japan

<sup>3</sup>Department of Infectious Diseases, Infection Control, and Employee Health, The University of Texas MD Anderson Cancer Center, Houston, TX

<sup>4</sup>Division of Pharmacy, The University of Texas MD Anderson Cancer Center, Houston, TX

<sup>5</sup>Division of Infectious Diseases, University of Pittsburgh School of Medicine, Pittsburgh, PA

<sup>6</sup>Department of Laboratory Medicine, Division of Pathology/Lab Medicine, The University of Texas MD Anderson Cancer Center, Houston, TX

<sup>7</sup>Department of Infectious Diseases, Fujita Health University School of Medicine, Toyoake, Aichi, Japan

Corresponding authors:

Akito Kawai, PhD, 1-98, Dengakugakubo, Kutsukake-cho, Toyoake, Aichi, 470-1192, Japan, phone: +81-562-93-2433, fax: +81-562-93-4003, email: kawai-a@fujita-hu.ac.jp

Yohei Doi, MD, PhD, BST E1057, 200 Lothrop Street, Pittsburgh, PA 15261, United States, phone: 412-648-9445, fax: 412-648-8521, email: yod4@pitt.edu

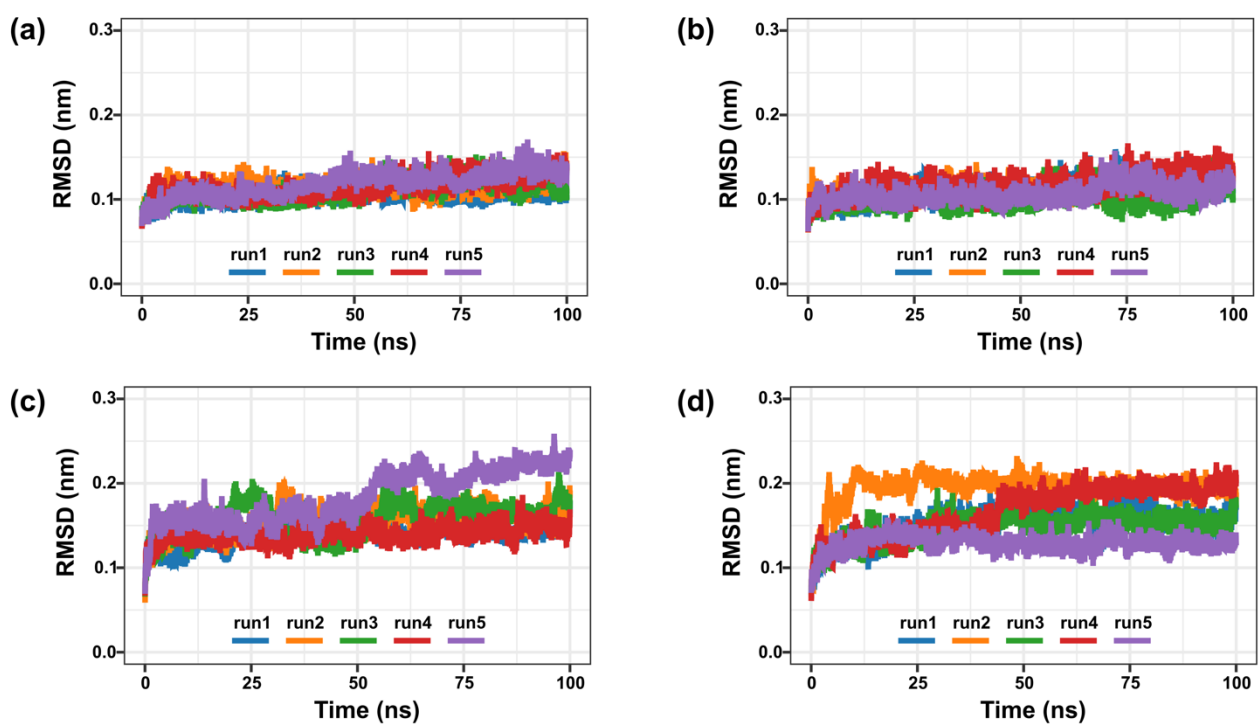

**Figure S1. The RMSD profile from the initial structure of the molecular dynamics simulation.**

The systems of CMY-2 in the free form (a) and the acyl complex with ceftazidime (b). The systems of CMY-185 in the free form (c) and the acyl complex with ceftazidime (d).

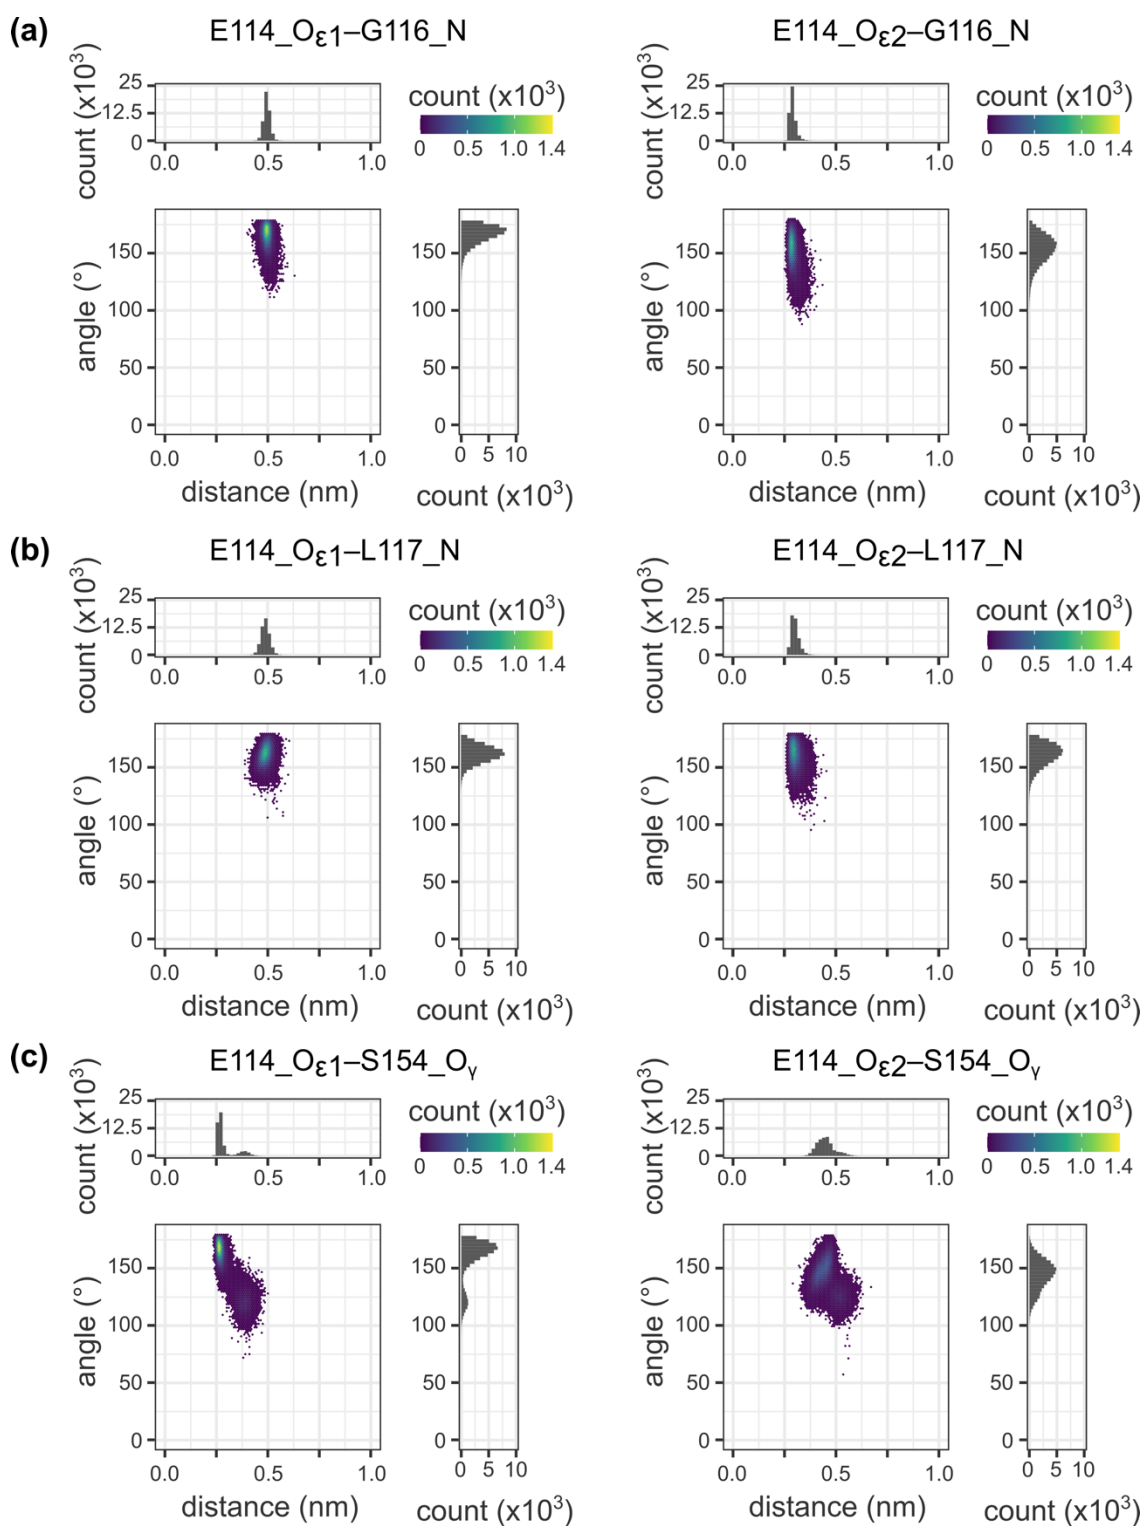

**Figure S2. Hydrogen bonds between E114 and G116, L117 or S154.**

2D histogram for the distribution for the distance and angle. “Distance” axis indicates the distance between the  $O_{\epsilon 1}$  atom (left) or the  $O_{\epsilon 2}$  atom (right) of E114 and the main chain N atom of G116 (a), L117 (b) or the  $O_{\gamma}$  atom of S154 (c). “Angle” axis indicates the angle between the central hydrogen atom and each heavy atom. Each points represents a snapshot from the molecular dynamics simulations, colored according to its counts shown in the color-bar on the top right corner.

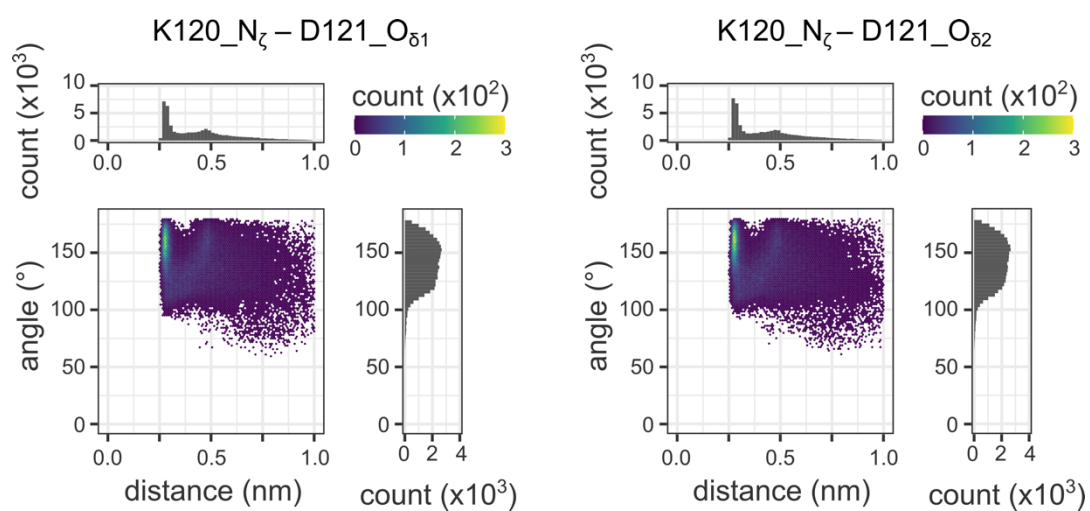

**Figure S3. Hydrogen bonds between K120 and D121.**

2D histogram for the distribution for the distance and angle. “Distance” axis indicates the distance between the  $N_{\zeta}$  atom of K120 and the  $O_{\delta 1}$  atom (left) or the  $O_{\delta 2}$  atom (right) of D121. “Angle” axis indicates the angle between the central hydrogen atom and each heavy atom. Each points represents a snapshot from the molecular dynamics simulations, colored according to its counts shown in the color-bar on the top right corner.

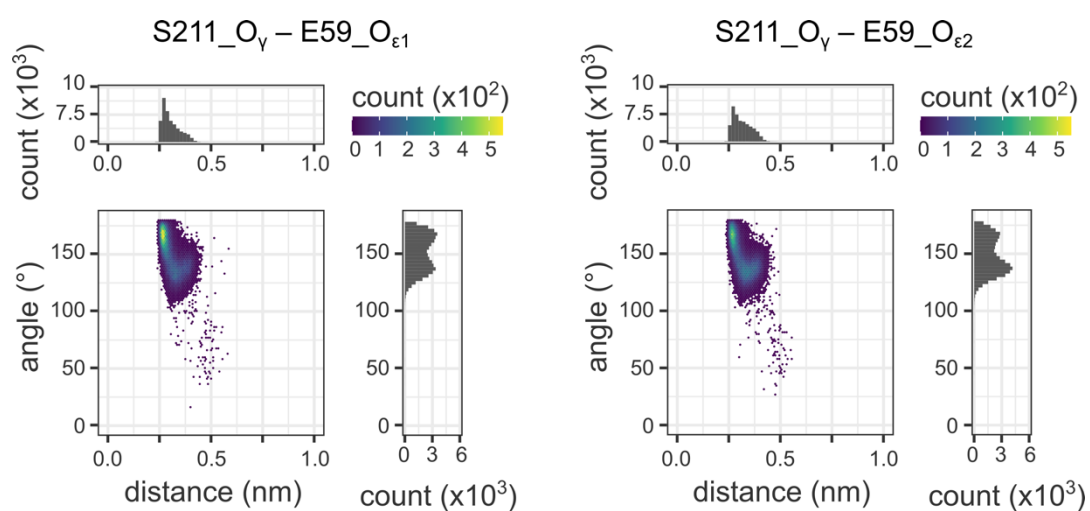

**Figure S4. Hydrogen bonds between S211 and E59.**

2D histogram for the distribution for the distance and angle. “Distance” axis indicates the distance between the  $O_{\gamma}$  atom of S211 and the  $O_{\epsilon 1}$  atom (left) or the  $O_{\epsilon 2}$  atom (right) of E59. “Angle” axis indicates the angle between the central hydrogen atom and each heavy atom. Each point represents a snapshot from the molecular dynamics simulations, colored according to its counts shown in the color-bar on the top right corner.
